1 **Opposing functions of the plant *TOPLESS* gene family during *SNC1*-mediated autoimmunity**

2

3 Christopher M. Garner<sup>a,b,c,1</sup>, Benjamin J. Spears<sup>a,c</sup>, Jianbin Su<sup>a,c</sup>, Leland Cseke<sup>a,c</sup>, Samantha N. Smith<sup>a,c</sup>,

4 Conner J. Rogan<sup>b,c,2</sup>, and Walter Gassmann<sup>a,c,§</sup>

5

6 <sup>a</sup>Division of Plant Sciences, University of Missouri, Columbia, MO 65211, USA

7 <sup>b</sup>Division of Biological Sciences, University of Missouri, Columbia, MO 65211, USA

8 <sup>c</sup>Christopher S. Bond Life Sciences Center and Interdisciplinary Plant Group, University of Missouri,

9 Columbia, MO 65211, USA

10

11 <sup>1</sup>Current Address: Thermo Fisher Scientific, Carlsbad, CA

12 <sup>2</sup>Current Address: Oregon State University, Corvallis, OR

13

14 <sup>§</sup>Corresponding author: [gassmannw@missouri.edu](mailto:gassmannw@missouri.edu)

15

16 Author contributions

17 Conceptualization: CMG, WG; formal analysis: CMG, BJS; funding acquisition: CMG, WG;

18 investigation: CMG, BJS, JS, SNS, CJR; methodology: CMG, BJS, JS; project administration: CMG,

19 WG; visualization: CMG, LC; writing - original: CMG; writing - review & editing: CMG, LC, WG

20

21 Short title: *TOPLESS-RELATED2* suppresses *SNC1*-mediated autoimmunity

22 **Abstract**

23 Regulation of the plant immune system is important for controlling the specificity and amplitude of  
24 responses to pathogens and in preventing growth-inhibiting autoimmunity that leads to reductions in  
25 plant fitness. In previous work, we reported that *SRFR1*, a negative regulator of effector-triggered  
26 immunity, interacts with *SNC1* and *EDS1*. When *SRFR1* is non-functional in the Arabidopsis accession  
27 Col-0, *SNC1* levels increase, causing a cascade of events that lead to autoimmunity phenotypes.  
28 Previous work showed that some members of the transcriptional co-repressor family *TOPLESS* interact  
29 with *SNC1* to repress negative regulators of immunity. Therefore, to explore potential connections  
30 between *SRFR1* and *TOPLESS* family members, we took a genetic approach that examined the effect of  
31 each *TOPLESS* member in the *srfr1* mutant background. The data indicated that an additive genetic  
32 interaction exists between *SRFR1* and two members of the *TOPLESS* family, *TPR2* and *TPR3*, as  
33 demonstrated by increased stunting and elevated *PR2* expression in *srfr1 tpr2* and *srfr1 tpr2 tpr3*  
34 mutants. Furthermore, the *tpr2* mutation intensifies autoimmunity in the auto-active *snc1-1* mutant,  
35 indicating a novel role of these *TOPLESS* family members in negatively regulating *SNC1*-dependent  
36 phenotypes. This negative regulation can also be reversed by overexpressing *TPR2* in the *srfr1 tpr2*  
37 background. Thus, this work uncovers diverse functions of individual members of the *TOPLESS* family  
38 in Arabidopsis and provides evidence for the additive effect of transcriptional and post-transcriptional  
39 regulation of *SNC1*.

40

## 41 **Author Summary**

42 The immune system is a double-edged sword that affords organisms with protection against infectious  
43 diseases but can also lead to negative effects if not properly controlled. Plants only possess an innate  
44 antimicrobial immune system that relies on rapid upregulation of defenses once immune receptors detect  
45 the presence of microbes. Plant immune receptors known as resistance proteins play a key role in rapidly  
46 triggering defenses if pathogens breach other defenses. A common model of unregulated immunity in  
47 the reference Arabidopsis variety Columbia-0 involves a resistance gene called *SNC1*. When the SNC1  
48 protein accumulates to unnaturally high levels or possesses auto-activating mutations, the visible  
49 manifestations of immune overactivity include stunted growth and low biomass and seedset.  
50 Consequently, expression of this gene and accumulation of the encoded protein are tightly regulated on  
51 multiple levels. Despite careful study the mechanisms of *SNC1* gene regulation are not fully understood.  
52 Here we present data on members of the well-known TOPLESS family of transcriptional repressors.  
53 While previously characterized members were shown to function in indirect activation of defenses,  
54 TPR2 and TPR3 are shown here to function in preventing high defense activity. This study therefore  
55 contributes to the understanding of complex regulatory processes in plant immunity.

56

## 57 **Introduction**

58 Plants defend against infection by having a multilayered immune system, one branch of which  
59 recognizes molecular signatures of microbes through pattern recognition receptors at the cell surface. At  
60 the same time, plants monitor potential intracellular targets of pathogen attack [1,2]. At the heart of this  
61 intracellular plant surveillance system are the resistance genes of the nucleotide binding site – leucine-  
62 rich repeat (NLR) class [3]. Resistance proteins recognize, directly or indirectly, the actions of  
63 pathogen-secreted effector proteins which seek to interfere with plant immune responses or normal plant  
64 physiology. Upon sensing the activity of effectors, resistance proteins elicit a rapid and robust defense  
65 response, called effector-triggered immunity (ETI). In the case of the biotrophic defense response, this  
66 includes accelerated production of high levels of the plant hormone salicylic acid (SA) and the induction  
67 of *PATHOGENESIS RELATED (PR)* genes [1].

68 Because of cross-talk between plant hormone pathways, activation of the defense response is  
69 accompanied by repression of pathways that promote growth [4–7]. Therefore, induction of the plant  
70 immune system must be kept under tight control to avoid fitness penalties incurred during the absence of  
71 pathogen infection [8], as illustrated by autoimmune mutants of *Arabidopsis* that display the negative  
72 effects of an unregulated immune response. More than thirty different mutants have been identified that  
73 cause an autoimmune response exhibited by dwarfism, high levels of salicylic acid, constitutive defense  
74 gene expression, and subsequent increased resistance to pathogens [9]. Genetic analysis of these mutants  
75 has provided a wealth of information regarding the identity of positive and negative regulators of the  
76 immune response, and they illustrate the many levels of regulation that take place within the plant  
77 immune system.

78 SUPPRESSOR of *rps4*-RLD1 (SRFR1) is a negative regulator of ETI mediated by several NLR  
79 proteins with a Toll/interleukin-1 receptor domain at their N-termini (TNLs), including RPS4/RRS1 and

80 SNC1 [10–12]. It was discovered in a genetic screen for mutants that were resistant to *Pseudomonas*  
81 *syringae* pv. *tomato* strain DC3000 expressing the bacterial effector AvrRps4 in the Arabidopsis  
82 accession RLD, which is normally susceptible because of natural inactivating polymorphisms in the  
83 *RPS4* resistance gene [10]. Mutants of *srfr1* in the Col-0 background constitutively activate SNC1  
84 expression, causing an autoimmune phenotype characterized by high levels of salicylic acid, constitutive  
85 expression of PR genes, and severe stunting [12,13]. This autoimmune phenotype is absent in the RLD  
86 background due to an absence of a full-length *SNC1* allele [12]. SRFR1 interacts with the TNLs RPS4,  
87 RPS6, and SNC1 as well as the central ETI regulator EDS1 in a complex disrupted by AvrRps4 [2,14].  
88 Furthermore, *srfr1 eds1* mutants lose increased resistance phenotypes [14]. These results place SRFR1  
89 as a key regulator of effector-triggered immunity conferred by the TNL class of resistance genes.

90 In addition to interactions within an ETI protein complex, homology to transcriptional regulators  
91 and interaction with transcription factors suggest SRFR1 could also be part of a transcriptional repressor  
92 complex [11]. SRFR1 interacts with members of the TEOSINTE BRANCHED1-CYCLOIDEA-  
93 PROLIFERATING CELL FACTOR (TCP) transcription factor family in the nucleus. Specifically,  
94 SRFR1 interacts strongly with TCP8, TCP14, and TCP15, and a triple *tcp8 tcp14 tcp15* mutant is  
95 compromised in effector-triggered immunity [15]. This interaction between SRFR1 and positive ETI  
96 regulators suggests a model wherein SRFR1 is restricting TCP access to promoters of defense-related  
97 genes, or recruiting other proteins that function as repressors of transcription at these promoters.

98 The five member Arabidopsis *TOPLESS* gene family (*TPL*, *TOPLESS RELATED1*, *TPR2*, *TPR3*,  
99 and *TPR4*) encodes members of the larger GRO/TUP1 family of corepressors that are proposed to  
100 interact with DNA-binding proteins in the promoter regions of regulated genes to repress transcription  
101 [16]. Analysis of TPL/TPR family interactions with transcription factors indicates that they have been  
102 coopted multiple times to regulate gene expression in diverse processes, including control of flowering

103 time, hormone signaling, and stress responses [17]. Structural studies also provide evidence that TPL  
104 tetramerizes as part of its interactions with protein partners, suggesting the possibility of heterotetramers  
105 within the TOPLESS family [18].

106 Furthermore, TPR1 was shown to interact with SNC1, and together the complex, with an as yet  
107 unknown DNA-binding transcription factor, represses transcription of genes that function as negative  
108 regulators of defense responses such as *DEFENSE NO DEATH 1 (DND1)* and *DND2*, which encode  
109 cyclic nucleotide-gated ion channels [19,20]. Therefore, similar to the interactions of SRF1 with the  
110 TNL-mediated ETI machinery and transcription factors, TOPLESS family members display multiple  
111 mechanisms in their functions as co-repressors.

112 Whether SRF1 is acting as part of a complex with the ETI machinery or functions as a  
113 transcriptional co-repressor, which molecular pathways regulate the autoimmunity phenotype of *srfr1*  
114 mutants remains a pressing question. Both models presented us with the possibility that *SRFR1* may also  
115 be interacting, at least genetically, with members of the TOPLESS family. Thus, we hypothesized that  
116 loss-of-function mutations in the *TOPLESS* gene family in the *srfr1-4* background would display similar  
117 phenotypes to the *tpl/tpr1* mutants in the *snc1-1* auto-active mutant background, reducing the *SNC1*-  
118 mediated autoimmune response. Here, we report the unexpected result that mutations in *TPR2* and *TPR3*  
119 have the opposite effect from those in *TPR1*, increasing the *SNC1* autoimmune response in the *srfr1-4*  
120 mutant background. This presents a novel function for TPR2 and TPR3 in either repressing positive  
121 regulators of the immune response or interfering with the SNC1-TPR1-mediated repression of negative  
122 regulators.

123

## 124 **Results**

125

126 **Mutations in *TPR2* exacerbate the *srfr1-4* autoimmune phenotype**

127 To investigate possible genetic interactions between *SRFR1* and members of the *TOPLESS* family, *srfr1-*  
128 *4* was crossed with T-DNA mutants in *TPL*, *TPR1*, *TPR2*, *TPR3*, and *TPR4*. Homozygous *srfr1-4 tpl/tpr*  
129 double mutants were compared to *srfr1-4* to determine if stunting, a measure of constitutively activated  
130 defenses, was affected. To quantify these differences in stunting we also measured shoot weights from  
131 each genotype after 4 weeks of growth. The results showed that *srfr1-4 tpl-8* and *srfr1-4 tpr2-2* were  
132 significantly different from *srfr1-4* in terms of size and overall shoot mass, in opposite directions (Fig 1).  
133 *PR2* is well established as an overall marker of immune system activation, and we found that the degree  
134 of stunting in this panel of auto-immune mutants correlated with their level of *PR2* expression (S1 Fig).  
135 Stunting in *srfr1-4* is due to the activation of the TNL gene *SNCI* [13,19]. Given that it was shown that  
136 mutation of *tpl* lessens the effect of stunting in autoactive *snc1-1* mutants [19], and the dependency of  
137 stunting in *srfr1-4* on activation of *SNCI*, we concluded that the effect we were seeing in *srfr1-4 tpl-8*  
138 mutants was a recapitulation of previous findings and chose not to investigate this mutant any further. We  
139 did not see a similar phenotype in *srfr1-4 tpr1-2*, most likely because the *tpr1-2* allele used here is not a  
140 true knockout.

141 In contrast, the increased stunting of *srfr1-4 tpr2-2* represents a novel genetic interaction, and as  
142 such we switched our focus to concentrate on the *SRFR1-TPR2* interaction. To verify that the increased  
143 autoimmunity phenotype was indeed caused by the insertion at the *TPR2* locus and not some other tightly  
144 linked mutation, we obtained a second allele of *TPR2*, *tpr2-1*, and crossed this allele to *srfr1-4*. As with  
145 *srfr1-4 tpr2-2*, we saw increased stunting in the *srfr1-4 tpr2-1* double mutant relative to *srfr1-4* (Fig 2A).  
146 To quantify these differences in stunting we measured shoot weights from each genotype after 4 weeks of  
147 growth. The results showed that *srfr1-4 tpr2-1* and *srfr1-4 tpr2-2* were significantly different from *srfr1-*

148 4 in terms of overall shoot mass (Fig 2B), but that neither *TPR2* single mutant was significantly different  
149 from Col-0.

150

### 151 ***TPR2* and *TPR3* are partially redundant in repressing autoimmunity in *srfr1-4***

152 Previous research has demonstrated functional redundancy amongst TOPLESS family members, and that  
153 higher order *tpl/tpr* knockouts produce stronger phenotypes than single *tpl/tpr* mutants [21–23]. Based on  
154 the close evolutionary relatedness of *TPR2* and *TPR3* (S2 Fig) and previous reports that indicated *TPL*,  
155 *TPR1*, and *TPR4* are repressors of negative regulators of immunity [19], we chose to investigate if  
156 mutations in *TPR3* would impact the *srfr1-4 tpr2-2* phenotype. To obtain a *srfr1-4 tpr2-2 tpr3-1* triple  
157 mutant, *srfr1-4 tpr2-2* was crossed with *srfr1-4 tpr3-1*. Analysis of shoot mass showed that the *srfr1-4*  
158 *tpr2-2 tpr3-1* triple mutant is significantly smaller than both *srfr1-4* and *srfr1-4 tpr2-2* (Fig3A and Fig3B).

159 As TOPLESS family members have been shown to be repressors of transcription we decided to  
160 examine the mRNA levels of *SNCI* in the *srfr1-4 tpr2-2* and *srfr1-4 tpr2-2 tpr3-1* mutants to see if they  
161 were affected relative to *srfr1-4*. We also examined *PR2* expression as a marker for overall immune  
162 activation and used qPCR rather than protein blotting to quantify subtle differences in mRNA levels for  
163 the remainder of this study. As illustrated in Fig 3C and 3D, *PR2* and *SNCI* mRNA levels were  
164 significantly increased in *srfr1-4 tpr2-2* and *srfr1-4 tpr2-2 tpr3-1* relative to *srfr1-4*; however, no  
165 significant change in *PR2* or *SNCI* expression was observed in the *tpr2-2* or *tpr3-1* single mutants.

166 Given the partial redundancy observed between *TPR2* and *TPR3* in the *srfr1-4* background and the  
167 lack of any observable phenotype in the single mutants, we crossed *tpr2-2* to *tpr3-1* to create a *tpr2-2*  
168 *tpr3-1* double mutant. No stunting or other morphological phenotypes were observed in *tpr2-2 tpr3-1* (Fig  
169 4A). We also found no significant difference between Col-0 and *tpr2-2 tpr3-1* with regards to *PR2*



170 expression; however, we did see a small but significant increase in *SNCI* expression in *tpr2-2 tpr3-1* when  
171 compared to Col-0 (Fig 4C and 4D).

172

### 173 **Overexpression of *TPR2* in the *srfr1-4* background represses autoimmunity**

174 We next asked if overexpressing *TPR2* would have the opposite effect and suppress autoimmunity in the  
175 *srfr1-4 tpr2-2* background. To test this hypothesis we cloned the *TPR2* coding sequence as a translational  
176 fusion with a C-terminal 10xMyc tag behind the constitutively active cauliflower mosaic virus 35S  
177 promoter. Using the 35S:*TPR2-myc* construct, several stable lines were created in the *srfr1-4 tpr2-2*  
178 genetic background. Two independent homozygous *TPR2-myc srfr1-4 tpr2-2* lines in the T3 generation,  
179 were planted alongside Col-0, *srfr1-4*, and *srfr1-4 tpr2-2* to compare the degree of stunting. At four weeks  
180 after planting, the *TPR2-myc srfr1-4 tpr2-2* plants were less stunted than both *srfr1-4 tpr2-2* and *srfr1-4*  
181 (Fig 5A).

182 Quantification of *SNCI* showed that not only was transcript level reduced below *srfr1-4 tpr2-2*  
183 levels, but was also less than *SNCI* levels in *srfr1-4* (Fig 5B), correlating with plant size (Fig 5A). The  
184 TNL gene *RPP4* is located within the *SNCI* locus and has been shown to be co-regulated with *SNCI* both  
185 at the level of transcription and after transcription by RNA silencing [24]. We have also previously shown  
186 that *RPP4* is upregulated in *srfr1-4* [12]. To determine if *TPR2* also affects *RPP4* expression in the *srfr1-4*  
187 background, we quantified *RPP4* mRNA in *srfr1-4 tpr2-2* and in *TPR2-myc srfr1-4 tpr2-2*. We saw a  
188 slight non-significant increase in *RPP4* expression in *srfr1-4 tpr2-2* relative to *srfr1-4*, while *RPP4* mRNA  
189 was reduced in *TPR2-myc srfr1-4 tpr2-2* below levels in *srfr1-4* (Fig 5C).

190

### 191 **Increased autoimmunity in *srfr1-4 tpr2-2* is partially dependent upon *SNCI***

192 Previous work has shown that stunting in *srfr1-4* is dependent on *SNCI*, and that a *srfr1-4 snc1-11*  
193 double mutant is morphologically normal but still expresses higher than normal levels of several  
194 defense-related genes [12]. To see if the enhanced autoimmunity that results from mutating *TPR2* in the  
195 *srfr1-4* background is dependent on *SNCI*, we created a quadruple mutant by crossing the *SNCI*  
196 knockout allele, *snc1-11*, to *srfr1-4 tpr2-2 tpr3-1*. As was previously observed for *srfr1-4 snc1-11*, we  
197 saw no stunting or morphological abnormalities in the *srfr1-4 snc1-11 tpr2-2 tpr3-1* quadruple mutant  
198 (Fig 6A). *SRFR1* regulation of *RPP4* is *SNCI* independent as *RPP4* is upregulated equally in both *srfr1-*  
199 *4* and *srfr1-4 snc1-11* relative to wild type levels in Col-0 [12]. Interestingly, *RPP4* expression was  
200 significantly decreased both in *srfr1-4 snc1-11 tpr2-2 tpr3-1* compared to *srfr1-4 snc1-11* and in *snc1-11*  
201 *tpr2-2 tpr3-1* compared to *snc1-11* (Fig 6B), whereas *RPP4* mRNA levels in the *srfr1-4 tpr2-2* mutant  
202 were slightly higher than in *srfr1-4* (Fig 5C), indicating that these higher *RPP4* mRNA levels are at least  
203 partially dependent upon *SNCI*. Consistent with our previous study, we saw an increase in *PR2* levels in  
204 the *srfr1-4 snc1-11* double mutant compared to Col-0 and *snc1-11*. *PR2* levels in *srfr1-4 snc1-11 tpr2-2*  
205 *tpr3-1* were comparable to those in *srfr1-4 snc1-11* (Fig 5C).

206 To further investigate the relationship between *TPR2* and *SNCI* activity, we crossed *tpr2-2* to  
207 *snc1-1*, an auto-active allele of *SNCI* that induces a constitutive defense response and associated  
208 stunting [25]. The F2 from this cross produced approximately 1/16<sup>th</sup> plants which genotyped as  
209 homozygous *snc1-1 tpr2-2* that were extremely stunted and produced very little seed. When compared  
210 to *snc1-1*, *snc1-1 tpr2-2* was significantly more stunted, and had significantly higher levels of *SNCI* and  
211 *PR2* mRNA (Fig 7). These results are consistent with the conclusion that the autoimmune phenotypes  
212 modulated by mutations in *SRFR1* and *TPR2* are tightly associated with *SNCI*.

213

214 ***SRFR1* acts upstream of *SNCI* transcription**

215 Transcription of *SNC1* is subject to feedback regulation through the production of salicylic acid. Upon  
216 activation of SNC1, SA accumulates in the plant and increased levels of SA cause even more  
217 transcription of *SNC1* [26]. Our data show that *tpr2-2* increases *SNC1* mRNA levels in the *srfr1-4* and  
218 *snc1-1* backgrounds, but because of the complex feedback regulation of *SNC1* transcription it is unclear  
219 whether *SRFR1* and *TPR2* are directly affecting transcription at the *SNC1* locus, or if they are repressing  
220 some component downstream of SNC1 activation. Signaling for all Arabidopsis TNL class resistance  
221 proteins identified to date is dependent upon EDS1 [27], and mutating *EDS1* blocks the feedback  
222 regulation of SNC1, thereby making it possible to disambiguate events upstream of *SNC1* transcription  
223 from events downstream of SNC1 activation [28]. The *eds1-2* allele is a knockout for *EDS1* introgressed  
224 into Col-0 [29]. Previous work has shown that a *srfr1-4 eds1-2* double mutant shows no signs of  
225 enhanced basal resistance and is morphologically indistinguishable from Col-0 [14].

226 To determine if the *tpr2-2* mutation had any effect on transcription of *SNC1* in *srfr1-4 eds1-2*,  
227 we crossed *eds1-2* to *tpr2-2* and *srfr1-4 tpr2-2* to *srfr1-4 eds1-2* and obtained *eds1-2 tpr2-2* and *srfr1-4*  
228 *eds1-2 tpr2-2* mutants. As seen previously with the *srfr1-4 eds1-2* double mutant, the *srfr1-4 eds1-2*  
229 *tpr2-2* triple mutant was not morphologically different from Col-0 (Fig 8A). When we quantified the  
230 amount of *SNC1* transcript in these plants we found that *srfr1-4 eds1-2* produced significantly more  
231 *SNC1* than Col-0, *eds1-2*, and *eds1-2 tpr2-2* (Fig 8B). The *srfr1-4 eds1-2 tpr2-2* triple mutant had a  
232 repeatable but non-significant increase in *SNC1* relative to *srfr1-4 eds1-2* (Fig 8B). These data suggest  
233 that *SRFR1* also acts upstream of *SNC1* transcription, while *TPR2* acts downstream of *SNC1*  
234 transcription.

235 *TPR1* was previously shown to directly interact with the TIR domain of SNC1 [19]. To  
236 determine if *TPR2* interacts with SNC1, we performed an *in vitro* pull down assay between GST-tagged  
237 *TPR2* and T7-tagged SNC1-TIR domain. Pull down of GST-*TPR2* with GST beads co-precipitated T7-

238 SNC1-TIR, whereas pull down of GST alone failed to co-precipitate T7-SNC1-TIR (Fig 8C), indicative  
239 of a direct protein-protein interaction between TPR2 and SNC1. The post-transcriptional activity of  
240 TPR2 may therefore consist of competing with TPR1 for binding of SNC1.

241

## 242 **Discussion**

243

244 To determine whether members of the *TPL* transcriptional repressor gene family functionally interact  
245 with *SRFR1* we chose a genetic approach. By creating double and higher order mutants between *srfr1-4*,  
246 members of the *TOPLESS* family, and other genes relevant to the *srfr1-4* autoimmune phenotype, we  
247 were able to assess the impact these genes had on constitutive immunity. Our results indicate a genetic  
248 interaction between *SRFR1* and *TPR2* and its close homolog *TPR3*. Further data show a novel genetic  
249 interaction between *SNC1* and *TPR2*. We found that stunting in *srfr1-4* was affected by mutations in  
250 *TPL* and *TPR2*, but in opposite ways; *srfr1-4 tpl-8* was less stunted, and *srfr1-4 tpr2-2* was more  
251 stunted. To verify that these phenotypes were a consequence of altered immune system regulation, and  
252 not a developmental phenotype unrelated to defense, we measured the expression of *PR2* as a marker of  
253 the defense response [30,31]. Previous research has shown that *PR1* and *PR2* mRNA levels are elevated  
254 in *srfr1-4* relative to wild type plants [12]. Here, we found that *PR2* levels in *srfr1-4 tpl-8* and *srfr1-4*  
255 *tpr2-2* are indeed consistent with differentially regulated immune system outputs in these double  
256 mutants.

257

## 258 **Contrasting roles of *TPR1/TPL* and *TPR2/TPR3***

259 Stunting, but not all aspects of heightened basal resistance in *srfr1-4* has been previously shown to be  
260 dependent upon the TNL gene *SNC1* [12]. One mechanism by which *SNC1* activates the immune

261 system was demonstrated to be through a protein interaction with TPR1, the end result of this interaction  
262 being the repression of negative regulators of defense such as *DND1* and *DND2*. *SNCI* was also shown  
263 to interact genetically with *TPL*, which shares 92% identity with TPR1 at the amino acid level [19]. The  
264 attenuated autoimmunity we observed in *srfr1-4 tpr1-8* is in agreement with this model. We did not see a  
265 similar phenotype in *srfr1-4 tpr1-2*, most likely because the *tpr1-2* allele is not a true knockout. We  
266 verified by sequencing out from the T-DNA that the location of the *tpr1-2* insertion is within the first  
267 intron of *TPR1*, which is located in the 5' untranslated region. This insertion may not be sufficient to  
268 knock out transcription of functional *TPR1* mRNA.

269 In contrast to *srfr1-4 tpr1-8*, the *srfr1-4 tpr2-2* phenotype is a novel case wherein a member of the  
270 *TOPLESS* family is implicated in repressing an immune response. Based on the strikingly different  
271 phenotypes of the double mutants we propose that TPR2 is repressing a set of genes disparate from that  
272 of TPR1 or is activating genes in the *srfr1-4* background. We verified that the exacerbated autoimmune  
273 phenotype in *srfr1-4 tpr2-2* was linked to *TPR2* by demonstrating that another allele of *TPR2*, *tpr2-1*,  
274 could produce the same phenotype in *srfr1-4*.

275 Previous research has shown varying degrees of redundancy amongst the different members of  
276 the *TOPLESS* family depending on the process under study. In embryogenesis and circadian clock  
277 regulation, knocking out all *TPL/TPR* genes is required to see a phenotype [21,32], whereas the  
278 repression of brassinosteroid-sensitive genes via BZR1 requires specifically TPL, TPR1, and TPR4 [23].  
279 Here we show that *TPR3*, the closest homolog of *TPR2*, has some functional redundancy with *TPR2* in  
280 repressing autoimmunity in *srfr1-4* in that the *srfr1-4 tpr2-2 tpr3-1* triple mutant is significantly more  
281 stunted than *srfr1-4 tpr2-2* and shows increased *PR2* levels relative to *srfr1-4 tpr2-2* and *srfr1-4*.

282

283 **Contributions to *SNCI* regulation by *SRFR1***

284 Although stunting in *srfr1-4* is fully dependent upon *SNC1*, *SRFRI* has a broader effect on immune  
285 function independent of *SNC1*. The TNL resistance genes *RPS4*, *RPP4*, and *At4g16950* are all  
286 upregulated in *srfr1* mutants independent of *SNC1*, as well as several other genes related to immune  
287 function such as *EDS1*, *PAD4*, *SID2*, *PRI*, and *PR2* [11,12]. *SNC1* is located within the *RPP5* disease  
288 resistance locus, a complex locus containing several paralogous resistance genes [33]. It has been  
289 previously shown that activation of *SNC1* leads to increased transcription of other resistance genes at  
290 this locus, such as *RPP4* and *At4g16950* [12,24,34]. The mechanism by which *RPP4* and *At4g16950* are  
291 upregulated by activated *SNC1* is unknown, although two possibilities were proposed in Yi and  
292 Richards. The first involves upregulation as a result of increased SA caused by *SNC1* activation, citing  
293 previous work showing that application of SA is sufficient to cause a large increase in *SNC1* transcript  
294 [26]. However, they also do not rule out the possibility that chromatin structure at the locus might be  
295 altered due to increased transcription of *SNC1*, creating a permissive environment for transcription of  
296 neighboring paralogs [24].

297 Interestingly, *RPP4* and *At4g16950* are both upregulated in *srfr1-4 snc1-11* [12], a genetic  
298 background without a functional copy of *SNC1*, and as a consequence of this observation we  
299 hypothesized that the *PR2* increase we observed in *srfr1-4 snc1-11 tpr2-2 tpr3-1* could be due to a  
300 further increase in transcript of these other *RPP5* locus resistance genes. Surprisingly, *RPP4* levels were  
301 significantly decreased by adding the *tpr2* and *tpr3* mutations to *srfr1-4 snc1-11*, implying that the  
302 increased *RPP4* in *srfr1-4 tpr2-2* relative to *srfr1-4* is fully dependent upon increased *SNC1*. We  
303 therefore asked if *TPR2* had a genetic interaction with *SNC1* by crossing *tpr2-2* with *snc1-1*. The *snc1-1*  
304 allele contains a point mutation in the linker region between the NBS and LRR domains that causes  
305 constitutive activation of the *SNC1* protein and associated stunting caused by induction of the defense  
306 response without increasing the levels of *snc1-1* mRNA [25,35]. In the *snc1-1 tpr2-2* double mutant we

307 saw significantly increased stunting, and *snc1-1* and *PR2* mRNA levels, suggesting a role for *TPR2* in  
308 the downregulation of the *SNC1*-mediated constitutive defense response.

309 In order for resistance genes of the TNL class to function, the lipase like protein *EDS1* must be  
310 present [36–38]. To elucidate the position of *TPR2* in the *SNC1*-mediated constitutive defense response  
311 we took advantage of the *srfr1-4 eds1-2* double mutant which blocks increased basal resistance in *srfr1-*  
312 *4* [14] and consequently feedback upregulation of *SNC1*. Other studies have used mutations in *EDS1*,  
313 and closely related protein interactor *PAD4* which is also required for *SNC1* signaling, to block feedback  
314 upregulation of *SNC1* to determine if genes are acting upstream or downstream of *SNC1* activation  
315 [25,26,28,39]. In the *srfr1-4 eds1-2 tpr2-2* triple mutant we did not see a significant increase in *SNC1*  
316 mRNA absent of *SNC1* protein activation compared to *srfr1-4 eds1-2*. This result implies that *TPR2* is  
317 acting downstream of *SNC1* activation, whereas *SRFR1* also impacts the level of *SNC1* mRNA. This  
318 difference may be one component for the additive effect of mutations in *SRFR1* and *TPR2* on the level  
319 of constitutively activated defenses.

320

### 321 **Model for TPR2/TPR3 and SRFR1 functions in SNC1-mediated autoimmunity**

322 Based on these data we present the following model for *TPR2* and *SRFR1* function in autoimmunity  
323 caused by *SNC1* activation (Fig 9). In the *srfr1-4* background *SNC1* mRNA is expressed at a high level  
324 and *SNC1* is constitutively activated [12]. Disruption of protein-protein interactions between *SRFR1* and  
325 *SNC1* [12] could lead to *SNC1* activation; however, increased mRNA levels can also lead to *SNC1* auto-  
326 activation [24,40] and based on *SRFR1*'s interaction with TCP transcription factors a direct regulation of  
327 *SNC1* transcript levels [15,41] is consistent with the data obtained in the *eds1-2* background. Because in  
328 wild type plants levels of *SNC1* are kept low to avoid fitness penalties, the effects of *TPR2* mutations are  
329 only apparent when *SNC1* transcription is induced, such as in the autoimmune mutants *srfr1-4* and *snc1-*

330 I. We hypothesize that TPR2, and to some degree TPR3, acts downstream of *SNC1* transcription by  
331 repressing expression of a positive regulator of *SNC1* or activating a negative regulator. The physical  
332 interaction of TPR2 with the TIR domain of *SNC1* shown here raises the possibility that TPR2 competes  
333 with TPR1 for binding of *SNC1*, and that TPR1-*SNC1* and TPR2-*SNC1* complexes regulate target genes  
334 such as *DND1* and *DND2* in opposite ways. In addition, enhancement of the *snc1-1* phenotype by *tpr2-2*  
335 illustrates that the enhanced resistance phenotype is not dependent upon mutations in *SRFR1*. Together,  
336 this suggests that TPR2 and *SRFR1* are involved in separate pathways converging on regulation of *SNC1*.  
337

## 338 **Materials and Methods**

339

### 340 **Plant lines**

341 Plant lines used for genetic analysis were *tpl-8* (SALK\_036566), *tpr1-2* (SALK\_065650C), *tpr2-1*  
342 (SALK\_112730), *tpr2-2* (SALK\_079848C), *tpr3-1* (SALK\_029936), *tpr4-1* (SALK\_150008), *snc1-11*  
343 (SALK\_047058) from the Salk T-DNA knockout collection [42]. The *srfr1-4* line (SAIL\_412-E08) was  
344 from the Syngenta Arabidopsis Insertion Library [43]. Salk and SAIL lines were acquired from the  
345 Arabidopsis Biological Resource Center. The *eds1-2* line was a gift from Jane Parker, and the *snc1-1* line  
346 was a gift from Harrold van den Burg. All mutants are in the Col-0 background, and genotyping primers  
347 used for these lines are detailed in Table S1. After parental lines were crossed, plants were genotyped in  
348 the F1 generation to verify the success of the cross, and then in the F2 generation to identify plants  
349 homozygous for the desired mutations.

350

### 351 **Molecular cloning and generation of transgenic lines**



352 The TPR2-myc construct was created by amplifying the *TPR2* CDS with flanking SpeI and PacI sites at  
353 the 5' and 3' ends, respectively. The binary vector pGWB20 [44] was cut with XbaI and PacI to excise  
354 the Gateway cassette, and the SpeI-*TPR2*-PacI fragment was ligated into the XbaI and PacI sites in frame  
355 with the C-terminal myc tags in pGWB20. Sequencing was used to verify the clone. *Agrobacterium*  
356 *tumefaciens* strain C58-C1 was transformed with the TPR2-myc construct by electroporation. The *srfr1-*  
357 *4 tpr2-2* double mutant was grown at high temperatures to relieve stunting, and these plants were  
358 transformed by floral dip. Transgenic seed was selected on hygromycin B, and T3 homozygotes were  
359 selected by true breeding on selection plates. TPR2-myc protein expression was verified by western blot  
360 using c-Myc antibody sc-789 (Santa Cruz Biotechnology, Dallas, TX, USA).

361 The GST-TPR2 construct was created by amplifying the *TPR2* CDS with flanking EcoRI and NotI  
362 sites with an additional base between the EcoRI site and the start codon. The EcoRI-*TPR2*-NotI fragment  
363 was cloned into pGEX-4T-3 (SigmaAldrich, St. Louis, MO, USA) digested with EcoRI and NotI.  
364 Similarly, a cDNA encoding the SNC1 TIR domain (amino acids 1-182) was amplified with flanking  
365 EcoRI and XhoI sites. The EcoRI-*TIR*-XhoI fragment was cloned into pET28a (EMD Millipore, Billerica,  
366 MA USA) digested with EcoRI and XhoI to create *His-T7-SNC1 TIR*.

367

### 368 **RNA extraction, cDNA preparation and qPCR**

369 For qPCR experiments multiple plants from each genotype were ground together in liquid nitrogen to  
370 form one replicate. For each experiment two or three replicates were used per genotype. After grinding  
371 plant tissue in liquid nitrogen, total RNA was extracted using TRIZOL reagent (Thermo Fisher Scientific,  
372 Carlsbad, CA, USA). First strand cDNA synthesis was carried out using 2 ug of total RNA and reverse  
373 transcription was performed using an oligo (dT) 15 primer and Moloney murine leukemia virus (MMLV)  
374 reverse transcriptase (Promega, Madison, WI, USA). qPCR was carried out using SYBR GREEN PCR

375 Master Mix (Thermo Fisher Scientific) or Brilliant III Ultra-Fast SYBR Green qPCR Master Mix (Agilent,  
376 Santa Clara, CA, USA) on either an ABI 7500 or Agilent AriaMX qPCR system. Transcript levels were  
377 normalized using *SAND* gene (At2g28390) for qPCR experiments. LinRegPCR was used to determine  
378 PCR efficiency and cycle thresholds for each sample [45], and the  $2^{-\Delta\Delta C_T}$  method was used to determine  
379 expression levels [46]. Primers used for qPCR are detailed in Table S2.

380

### 381 **Protein pull-down assays**

382 GST-TPR2, empty pGEX-4T-3, and T7-SNC1-TIR in *E. coli* strain BL21(DE3) were streaked to single  
383 colonies and then incubated overnight at 37°C in LB broth. 200 ml of LB was inoculated with 2 ml of  
384 overnight culture and incubated for approximately 3 hours to an optical density of 0.6-0.8. IPTG at 500  
385  $\mu$ M was added to each culture and flasks were grown overnight at 22°C. Each culture was passed through  
386 a French press to lyse the cells. Extracts were centrifuged and 25  $\mu$ l of GST beads (G-Biosciences, St.  
387 Louis, MO USA) were added to 6  $\mu$ l supernatant of GST-TPR2 and empty pGEX-4T-3. Samples were  
388 incubated at 4°C for 1.5 hours with rotation. After washing 3 times with PBS, 6  $\mu$ l soluble protein T7-  
389 SNC1-TIR was added, and samples were incubated at 4°C for 1 hour. After washing 3 times with PBS  
390 protein was eluted from beads in Laemmli buffer and then used for protein blot with anti-GST and anti-  
391 T7 (EMD Millipore). For PR2 detection in S1 Fig, PR2 antibody AS207 208 (Agriseria, Vannas, Sweden)  
392 was used.

393

### 394 **Acknowledgements**

395 We thank Harrold van den Burg for the *snc1-1* plant line, Gary Stacey for the pGWB20 vector, and  
396 Daniel Leuchtman and Sanzida Rahman for help with statistical analyses.

397 **References**

- 398 1. Cui H, Tsuda K, Parker JE. Effector-Triggered Immunity: From Pathogen Perception to  
399 Robust Defense. *Annu Rev Plant Biol.* 2015;66: 487–511. doi:10.1146/annurev-arplant-  
400 050213-040012
- 401 2. Su J, Spears BJ, Kim SH, Gassmann W. Constant vigilance: plant functions guarded by  
402 resistance proteins. *Plant J Cell Mol Biol.* 2018;93: 637–650. doi:10.1111/tpj.13798
- 403 3. Li X, Kapos P, Zhang Y. NLRs in plants. *Curr Opin Immunol.* 2015;32: 114–121.  
404 doi:10.1016/j.coi.2015.01.014
- 405 4. Huot B, Yao J, Montgomery BL, He SY. Growth-defense tradeoffs in plants: a balancing  
406 act to optimize fitness. *Mol Plant.* 2014;7: 1267–1287. doi:10.1093/mp/ssu049
- 407 5. Lozano-Durán R, Zipfel C. Trade-off between growth and immunity: role of  
408 brassinosteroids. *Trends Plant Sci.* 2015;20: 12–19. doi:10.1016/j.tplants.2014.09.003
- 409 6. Karasov TL, Chae E, Herman JJ, Bergelson J. Mechanisms to Mitigate the Trade-Off  
410 between Growth and Defense. *Plant Cell.* 2017;29: 666–680. doi:10.1105/tpc.16.00931
- 411 7. Guo Q, Yoshida Y, Major IT, Wang K, Sugimoto K, Kapali G, et al. JAZ repressors of  
412 metabolic defense promote growth and reproductive fitness in Arabidopsis. *Proc Natl Acad*  
413 *Sci U S A.* 2018;115: E10768–E10777. doi:10.1073/pnas.1811828115
- 414 8. van Butselaar T, Van den Ackerveken G. Salicylic Acid Steers the Growth-Immunity  
415 Tradeoff. *Trends Plant Sci.* 2020;25: 566–576. doi:10.1016/j.tplants.2020.02.002
- 416 9. van Wersch R, Li X, Zhang Y. Mighty Dwarfs: Arabidopsis Autoimmune Mutants and  
417 Their Usages in Genetic Dissection of Plant Immunity. *Front Plant Sci.* 2016;7: 1717.  
418 doi:10.3389/fpls.2016.01717

- 419 **10.** Kwon SI, Koczan JM, Gassmann W. Two Arabidopsis *srfr* (suppressor of *rps4*-RLD)  
420 mutants exhibit *avrRps4*-specific disease resistance independent of *RPS4*. *Plant J Cell Mol*  
421 *Biol.* 2004;40: 366–375. doi:10.1111/j.1365-313X.2004.02213.x
- 422 **11.** Kim SH, Kwon SI, Bhattacharjee S, Gassmann W. Regulation of defense gene expression  
423 by Arabidopsis *SRFRI*. *Plant Signal Behav.* 2009;4: 149–150. doi:10.4161/psb.4.2.7682
- 424 **12.** Kim SH, Gao F, Bhattacharjee S, Adiasor JA, Nam JC, Gassmann W. The Arabidopsis  
425 resistance-like gene *SNCI* is activated by mutations in *SRFRI* and contributes to resistance  
426 to the bacterial effector *AvrRps4*. *PLoS Pathog.* 2010;6: e1001172.  
427 doi:10.1371/journal.ppat.1001172
- 428 **13.** Li Y, Li S, Bi D, Cheng Y-T, Li X, Zhang Y. (2010) *SRFR1* negatively regulates plant NB-  
429 LRR resistance protein accumulation to prevent autoimmunity. *PLoS Pathog* 6: e1001111.  
430 doi:10.1371/journal.ppat.1001111
- 431 **14.** Bhattacharjee S, Halane MK, Kim SH, Gassmann W. Pathogen effectors target Arabidopsis  
432 *EDS1* and alter its interactions with immune regulators. *Science.* 2011;334: 1405–1408.  
433 doi:10.1126/science.1211592
- 434 **15.** Kim SH, Son GH, Bhattacharjee S, Kim HJ, Nam JC, Nguyen PDT, et al. The Arabidopsis  
435 immune adaptor *SRFR1* interacts with TCP transcription factors that redundantly contribute  
436 to effector-triggered immunity. *Plant J Cell Mol Biol.* 2014;78: 978–989.  
437 doi:10.1111/tpj.12527
- 438 **16.** Lee JE, Golz JF. Diverse roles of Groucho/Tup1 co-repressors in plant growth and  
439 development. *Plant Signal Behav.* 2012;7: 86–92. doi:10.4161/psb.7.1.18377

- 440 **17.** Causier B, Ashworth M, Guo W, Davies B. The TOPLESS interactome: a framework for  
441 gene repression in Arabidopsis. *Plant Physiol.* 2012;158: 423–438.  
442 doi:10.1104/pp.111.186999
- 443 **18.** Martin-Arevalillo R, Nanao MH, Larrieu A, Vinos-Poyo T, Mast D, Galvan-Ampudia C, et  
444 al. Structure of the Arabidopsis TOPLESS corepressor provides insight into the evolution  
445 of transcriptional repression. *Proc Natl Acad Sci U S A.* 2017;114: 8107–8112.  
446 doi:10.1073/pnas.1703054114
- 447 **19.** Zhu Z, Xu F, Zhang Y, Cheng YT, Wiermer M, Li X, et al. Arabidopsis resistance protein  
448 SNC1 activates immune responses through association with a transcriptional corepressor.  
449 *Proc Natl Acad Sci U S A.* 2010;107: 13960–13965. doi:10.1073/pnas.1002828107
- 450 **20.** Niu D, Lin X-L, Kong X, Qu G-P, Cai B, Lee J, et al. SIZ1-Mediated SUMOylation of  
451 TPR1 Suppresses Plant Immunity in Arabidopsis. *Mol Plant.* 2019;12: 215–228.  
452 doi:10.1016/j.molp.2018.12.002
- 453 **21.** Long JA, Ohno C, Smith ZR, Meyerowitz EM. TOPLESS regulates apical embryonic fate  
454 in Arabidopsis. *Science.* 2006;312: 1520–1523. doi:10.1126/science.1123841
- 455 **22.** Wang Y, An C, Zhang X, Yao J, Zhang Y, Sun Y, et al. The Arabidopsis elongator  
456 complex subunit2 epigenetically regulates plant immune responses. *Plant Cell.* 2013;25:  
457 762–776. doi:10.1105/tpc.113.109116
- 458 **23.** Oh E, Zhu J-Y, Ryu H, Hwang I, Wang Z-Y. TOPLESS mediates brassinosteroid-induced  
459 transcriptional repression through interaction with BZR1. *Nat Commun.* 2014;5: 4140.  
460 doi:10.1038/ncomms5140

- 461 **24.** Yi H, Richards EJ. A Cluster of Disease Resistance Genes in Arabidopsis Is Coordinately  
462 Regulated by Transcriptional Activation and RNA Silencing. *Plant Cell*. 2007;19: 2929–  
463 2939. doi:10.1105/tpc.107.051821
- 464 **25.** Zhang Y, Goritschnig S, Dong X, Li X. A Gain-of-Function Mutation in a Plant Disease  
465 Resistance Gene Leads to Constitutive Activation of Downstream Signal Transduction  
466 Pathways in *suppressor of npr1-1, constitutive 1*. *Plant Cell*. 2003;15: 2636–2646.  
467 doi:10.1105/tpc.015842
- 468 **26.** Yang S, Hua J. A Haplotype-Specific Resistance Gene Regulated by *BONZAI1* Mediates  
469 Temperature-Dependent Growth Control in Arabidopsis. *Plant Cell*. 2004;16: 1060–1071.  
470 doi:10.1105/tpc.020479
- 471 **27.** Kim T-H, Kunz H-H, Bhattacharjee S, Hauser F, Park J, Engineer C, et al. Natural variation  
472 in small molecule-induced TIR-NB-LRR signaling induces root growth arrest via EDS1-  
473 and PAD4-complexed R protein VICTR in Arabidopsis. *Plant Cell*. 2012;24: 5177–5192.  
474 doi:10.1105/tpc.112.107235
- 475 **28.** Huang S, Chen X, Zhong X, Li M, Ao K, Huang J, et al. Plant TRAF Proteins Regulate  
476 NLR Immune Receptor Turnover. *Cell Host Microbe*. 2016;20: 271.  
477 doi:10.1016/j.chom.2016.07.005
- 478 **29.** Bartsch M, Gobbato E, Bednarek P, Debey S, Schultze JL, Bautor J, et al. Salicylic Acid–  
479 Independent ENHANCED DISEASE SUSCEPTIBILITY1 Signaling in Arabidopsis  
480 Immunity and Cell Death Is Regulated by the Monooxygenase *FMO1* and the Nudix  
481 Hydrolase *NUDT7*. *Plant Cell*. 2006;18: 1038–1051. doi:10.1105/tpc.105.039982

- 482 **30.** Dong X, Mindrinos M, Davis KR, Ausubel FM. Induction of Arabidopsis defense genes by  
483 virulent and avirulent *Pseudomonas syringae* strains and by a cloned avirulence gene. *Plant*  
484 *Cell*. 1991;3: 61–72. doi:10.1105/tpc.3.1.61
- 485 **31.** Cordelier S, de Ruffray P, Fritig B, Kauffmann S. Biological and molecular comparison  
486 between localized and systemic acquired resistance induced in tobacco by a *Phytophthora*  
487 *megasperma* glycoprotein elicitor. *Plant Mol Biol*. 2003;51: 109–118.  
488 doi:10.1023/a:1020722102871
- 489 **32.** Wang L, Kim J, Somers DE. Transcriptional corepressor TOPLESS complexes with  
490 pseudoresponse regulator proteins and histone deacetylases to regulate circadian  
491 transcription. *Proc Natl Acad Sci*. 2013;110: 761–766. doi:10.1073/pnas.1215010110
- 492 **33.** Noël L, Moores TL, van Der Biezen EA, Parniske M, Daniels MJ, Parker JE, et al.  
493 Pronounced intraspecific haplotype divergence at the RPP5 complex disease resistance  
494 locus of Arabidopsis. *Plant Cell*. 1999;11: 2099–2112.
- 495 **34.** Zou B, Yang D-L, Shi Z, Dong H, Hua J. Monoubiquitination of histone 2B at the disease  
496 resistance gene locus regulates its expression and impacts immune responses in  
497 Arabidopsis. *Plant Physiol*. 2014;165: 309–318. doi:10.1104/pp.113.227801
- 498 **35.** Li X, Clarke JD, Zhang Y, Dong X. Activation of an EDS1-mediated *R*-gene pathway in  
499 the *snc1* mutant leads to constitutive, NPR1-independent pathogen resistance. *Mol Plant-*  
500 *Microbe Interact MPMI*. 2001;14: 1131–1139. doi:10.1094/MPMI.2001.14.10.1131
- 501 **36.** Parker JE, Holub EB, Frost LN, Falk A, Gunn ND, Daniels MJ. Characterization of *eds1*, a  
502 mutation in Arabidopsis suppressing resistance to *Peronospora parasitica* specified by  
503 several different *RPP* genes. *Plant Cell*. 1996;8: 2033–2046. doi:10.1105/tpc.8.11.2033

- 504 **37.** Aarts N, Metz M, Holub E, Staskawicz BJ, Daniels MJ, Parker JE. Different requirements  
505 for *EDS1* and NDR1 by disease resistance genes define at least two *R* gene-mediated  
506 signaling pathways in Arabidopsis. Proc Natl Acad Sci U S A. 1998;95: 10306–10311.  
507 doi:10.1073/pnas.95.17.10306
- 508 **38.** Falk A, Feys BJ, Frost LN, Jones JD, Daniels MJ, Parker JE. *EDS1*, an essential component  
509 of *R* gene-mediated disease resistance in Arabidopsis has homology to eukaryotic lipases.  
510 Proc Natl Acad Sci U S A. 1999;96: 3292–3297. doi:10.1073/pnas.96.6.3292
- 511 **39.** Feys BJ, Moisan LJ, Newman MA, Parker JE. Direct interaction between the Arabidopsis  
512 disease resistance signaling proteins, EDS1 and PAD4. EMBO J. 2001;20: 5400–5411.  
513 doi:10.1093/emboj/20.19.5400
- 514 **40.** Li Y, Yang S, Yang H, Hua J. The TIR-NB-LRR gene *SNCI* is regulated at the transcript  
515 level by multiple factors. Mol Plant-Microbe Interact MPMI. 2007;20: 1449–1456.  
516 doi:10.1094/MPMI-20-11-1449
- 517 **41.** Zhang N, Wang Z, Bao Z, Yang L, Wu D, Shu X, et al. MOS1 functions closely with TCP  
518 transcription factors to modulate immunity and cell cycle in Arabidopsis. Plant J Cell Mol  
519 Biol. 2018;93: 66–78. doi:10.1111/tpj.13757
- 520 **42.** Alonso JM, Stepanova AN, Leisse TJ, Kim CJ, Chen H, Shinn P, et al. Genome-wide  
521 insertional mutagenesis of *Arabidopsis thaliana*. Science. 2003;301: 653–657.  
522 doi:10.1126/science.1086391
- 523 **43.** Sessions A, Burke E, Presting G, Aux G, McElver J, Patton D, et al. A high-throughput  
524 Arabidopsis reverse genetics system. Plant Cell. 2002;14: 2985–2994.  
525 doi:10.1105/tpc.004630



- 526 **44.** Nakagawa T, Kurose T, Hino T, Tanaka K, Kawamukai M, Niwa Y, et al. Development of  
527 series of gateway binary vectors, pGWBs, for realizing efficient construction of fusion  
528 genes for plant transformation. *J Biosci Bioeng.* 2007;104: 34–41. doi:10.1263/jbb.104.34
- 529 **45.** Ruijter JM, Ramakers C, Hoogaars WMH, Karlen Y, Bakker O, van den Hoff MJB, et al.  
530 Amplification efficiency: linking baseline and bias in the analysis of quantitative PCR data.  
531 *Nucleic Acids Res.* 2009;37: e45. doi:10.1093/nar/gkp045
- 532 **46.** Livak KJ, Schmittgen TD. Analysis of relative gene expression data using real-time  
533 quantitative PCR and the 2<sup>-</sup>(Delta Delta C(T)) Method. *Methods San Diego Calif.* 2001;25:  
534 402–408. doi:10.1006/meth.2001.1262
- 535
- 536

537 **Figure Legends**

538

539 **Fig 1. Loss of function of *TPR2* increases stunting in *srfr1*.**

540 (A) Morphological phenotype of *srfr1-4* and *srfr1-4 tpl/tpr* double mutants at four weeks post  
541 sowing. (B) Shoot weight from plants grown under short day conditions at 21°C for four weeks.  
542 Dots represent individual data points taken over two separate experiments. Whiskers on boxplots  
543 are drawn to the farthest data point within 1.5 \* IQR of first and third quartiles. Letters denote  
544 significant differences as determined by Student's t-test ( $P < 0.01$ ) using the Bonferroni-Holm  
545 method to correct for multiple comparisons.

546

547 **Fig 2. Multiple alleles of *TPR2* increase stunting in *srfr1*.**

548 (A) Morphological phenotypes of *tpr2-1*, *tpr2-2*, *srfr1-4*, *srfr1-4 tpr2-1*, and *srfr1-4 tpr2-2* at  
549 four weeks post sowing. (B) Shoot weight from plants grown under short day conditions at 21°C  
550 for four weeks. Dots represent individual data points. Whiskers on boxplots are drawn to the  
551 farthest data point within 1.5 \* IQR of first and third quartiles. Letters denote significant  
552 differences as determined by Student's t-test ( $P < 0.05$ ) using the Bonferroni-Holm method to  
553 correct for multiple comparisons.

554

555 **Fig 3. Simultaneous loss of *TPR2* and *TPR3* increases stunting and expression of *PR2* and**

556 ***SNCI* in *srfr1*.**

557 (A) Morphological phenotype of *srfr1-4*, *srfr1-4 tpr2-2*, and *srfr1-4 tpr2-2 tpr3-1* at 20 days after  
558 sowing. Plants were grown under short day conditions at 21°C. (B) Shoot weight from plants  
559 grown under short day conditions at 21°C for four weeks. Dots represent individual data points

560 taken over two separate experiments. Whiskers on boxplots are drawn to the farthest data point  
561 within 1.5 \* IQR of first and third quartiles. Letters denote significant differences as determined  
562 by Student's t-test ( $P < 0.001$ ) using the Bonferroni-Holm method to correct for multiple  
563 comparisons. (C&D) Expression as measured by quantitative RT-PCR of *PR2* and *SNCI* in  
564 single, double, and triple mutants. Dots represent individual data points taken over two separate  
565 experiments. Genes of interest were normalized against *SAND* (At2g28390). Whiskers on  
566 boxplots are drawn to the farthest data point within 1.5 \* IQR of first and third quartiles. Letters  
567 denote significant differences as determined by Student's t-test ( $P < 0.05$ ) using the Bonferroni-  
568 Holm method to correct for multiple comparisons.

569

570 **Fig 4. *SNCI* expression is increased in *tpr2 tpr3***

571 (A) Morphological phenotype of *tpr2-2 tpr3-1*. Plants were grown for four weeks under short  
572 day conditions at 21°C. (B&C) Expression as measured by quantitative RT-PCR of *PR2* and  
573 *SNCI*. Dots represent individual data points taken over two separate experiments. Genes of  
574 interest were normalized against *SAND* (At2g28390). Whiskers on boxplots are drawn to the  
575 farthest data point within 1.5 \* IQR of first and third quartiles. Asterisks denote significant  
576 differences as determined by Student's t-test ( $P < 0.005$ ) using the Bonferroni-Holm method to  
577 correct for multiple comparisons.

578

579 **Fig 5. Overexpression of TPR2 reduces stunting and *SNCI* expression in *srfr1 tpr2***

580 (A) Morphological phenotype of *TPR2-myc srfr1-4 tpr2-2* compared to *srfr1-4* and *srfr1-4 tpr2-*  
581 *2*. Plants were grown under short day conditions at 21°C for four weeks. (B&C) Expression as  
582 measured by quantitative RT-PCR of *SNCI* and *RPP4*. Dots represent individual data points

583 taken over two separate experiments. Genes of interest were normalized against *SAND*  
584 (At2g28390). Whiskers on boxplots are drawn to the farthest data point within 1.5 \* IQR of first  
585 and third quartiles. Letters denote significant differences as determined by Student's t-test  
586 ( $P < 0.05$ ) using the Bonferroni-Holm method to correct for multiple comparisons.

587

588 **Fig 6. *tpr2 tpr3* mutants have lower expression of *RPP4* in *snc1* knockouts**

589 (A) Morphological phenotype of plants harboring the *snc1-11* mutation crossed into *srfr1* and  
590 *tpr2 tpr3* mutants. Plants were grown under short day conditions at 21°C for four weeks. (B&C)  
591 Expression as measured by quantitative RT-PCR of *RPP4* and *PR2*. Dots represent individual  
592 data points taken over two separate experiments. Genes of interest were normalized against  
593 *SAND* (At2g28390). Whiskers on boxplots are drawn to the farthest data point within 1.5 \* IQR  
594 of first and third quartiles. Letters denote significant differences as determined by Student's t-test  
595 ( $P < 0.05$ ) using the Bonferroni-Holm method to correct for multiple comparisons.

596

597 **Fig 7. Mutations in *TPR2* increase stunting and *SNCI* expression in *snc1-1* mutants**

598 (A) Morphological phenotypes of *snc1-1* and *snc1-1 tpr2-2*. Plants were grown under short day  
599 conditions at 21°C for four weeks. (B&C) Expression as measured by quantitative RT-PCR of  
600 *SNCI* and *PR2*. Dots represent individual data points taken over two separate experiments.  
601 Genes of interest were normalized against *SAND* (At2g28390). Whiskers on boxplots are drawn  
602 to the farthest data point within 1.5 \* IQR of first and third quartiles. Letters denote significant  
603 differences as determined by Student's t-test ( $P < 0.01$ ) using the Bonferroni-Holm method to  
604 correct for multiple comparisons.

605

606 **Fig 8. SRFR1 acts upstream of SNC1 transcription**

607 (A) Morphological phenotypes of single, double, and triple mutants of *eds1-2*, *srfr1-4*, and *tpr2-*  
608 *2*. Plants were grown under short day conditions at 21°C for four weeks. (B) Expression as  
609 measured by quantitative RT-PCR of *SNC1*. Dots represent individual data points taken over two  
610 separate experiments. Genes of interest were normalized against *SAND* (At2g28390). Whiskers  
611 on boxplots are drawn to the farthest data point within 1.5 \* IQR of first and third quartiles.  
612 Letters denote significant differences as determined by Student's t-test ( $P < 0.01$ ) using the  
613 Bonferroni-Holm method to correct for multiple comparisons. (C) *In vitro* interaction of TPR2  
614 and the TIR domain of SNC1 in *E. coli*. Proteins were pulled down and subjected to immunoblot  
615 analysis with either GST or T7 antibodies. This experiment was repeated once with similar  
616 results.

617

618 **Fig 9. Model for TPR2/TPR3 and SRFR1 functions in SNC1-mediated autoimmunity**

619 (Left) In Col-0, low levels of *SNC1* help to avoid fitness penalties. This may be accomplished  
620 both through direct inhibition by SRFR1 and through competitive inhibition by TPR2 (additively  
621 with TPR3) of the demonstrated TPR1-SNC1 interaction that affects negative regulators of  
622 immunity such as *DND1/DND2* and indirectly subsequent *SNC1* expression. Here, the combined  
623 effects of SRFR1 and TPR2 hold *SNC1* expression in check. (Right) In the *srfr1-4 tpr2-2 tpr3-*  
624 *1* triple mutant, these molecular check points are released, allowing *SNC1* expression to trigger  
625 an autoimmune response that results in excessive stunting.

626

627

628

629 **S1 Fig. PR2 expression in *srfr1-4* is affected by *tpl* and *tpr2***

630 Western blot of total protein extracted from *srfr1-4*, *srfr1-4 tpl-8*, *srfr1-4 tpr1-2*, *srfr1-4 tpr2-2*,  
631 *srfr1-4 tpr3-1*, and *srfr1-4 tpr4-1*. The large subunit of rubisco is shown as a loading control.

632

633 **S2 Fig. Phylogenetic tree of the *Arabidopsis thaliana* TOPLESS family**

634 Phylogram showing evolutionary relationships amongst *TOPLESS* family members. The WD40  
635 protein *LEUNIG (LUG)* is included as the outgroup. Tree was generated from full length cDNA  
636 sequences using [www.phylogeny.fr](http://www.phylogeny.fr).

637

638 **S1 Table. PCR primers used for genotyping mutant lines**

639

640 **S2 Table. Primers used for qPCR**

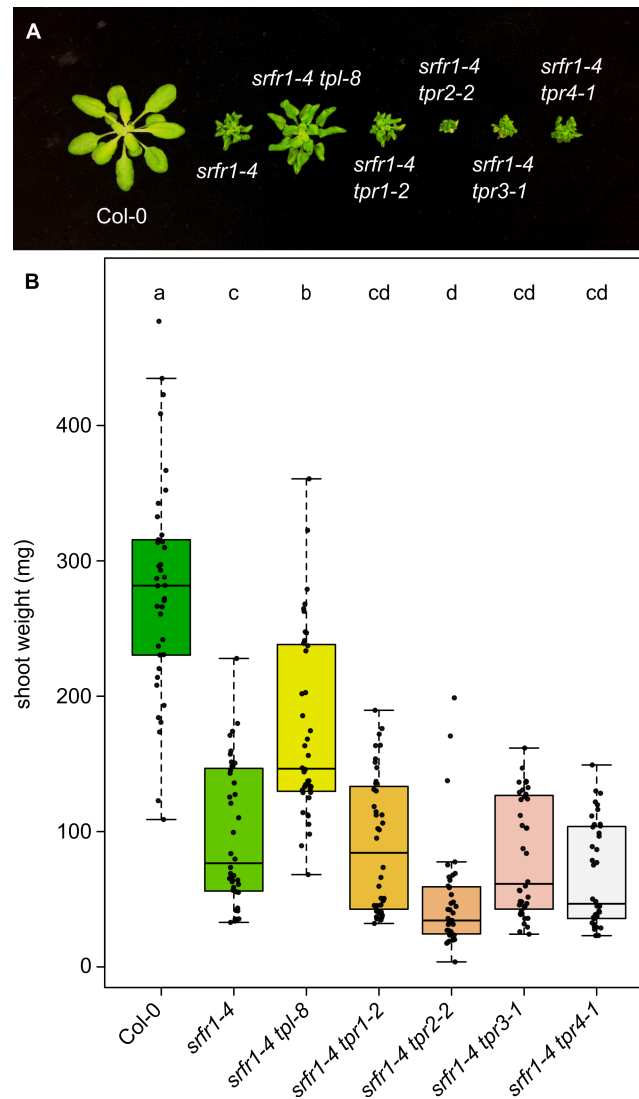

**Fig 1. Loss of function of *TPR2* increases stunting in *srfr1*.**

(A) Morphological phenotype of *srfr1-4* and *srfr1-4 tpr/tpr* double mutants at four weeks post sowing. (B) Shoot weight from plants grown under short day conditions at 21°C for four weeks. Dots represent individual data points taken over two separate experiments. Whiskers on boxplots are drawn to the farthest data point within 1.5 \* IQR of first and third quartiles. Letters denote significant differences as determined by Student's t-test ( $P < 0.01$ ) using the Bonferroni-Holm method to correct for multiple comparisons.

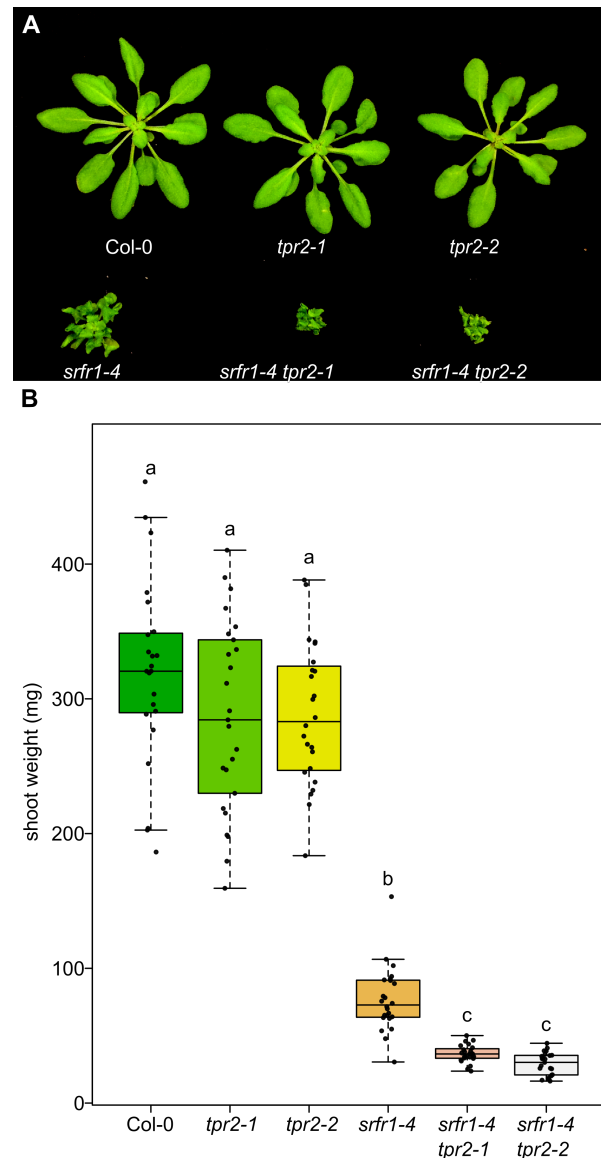

**Fig 2. Multiple alleles of *TPR2* increase stunting in *srf1*.**

(A) Morphological phenotypes of *tpr2-1*, *tpr2-2*, *srf1-4*, *srf1-4 tpr2-1*, and *srf1-4 tpr2-2* at four weeks post sowing. (B) Shoot weight from plants grown under short day conditions at 21°C for four weeks. Dots represent individual data points. Whiskers on boxplots are drawn to the farthest data point within 1.5 \* IQR of first and third quartiles. Letters denote significant differences as determined by Student's t-test ( $P < 0.05$ ) using the Bonferroni-Holm method to correct for multiple comparisons.



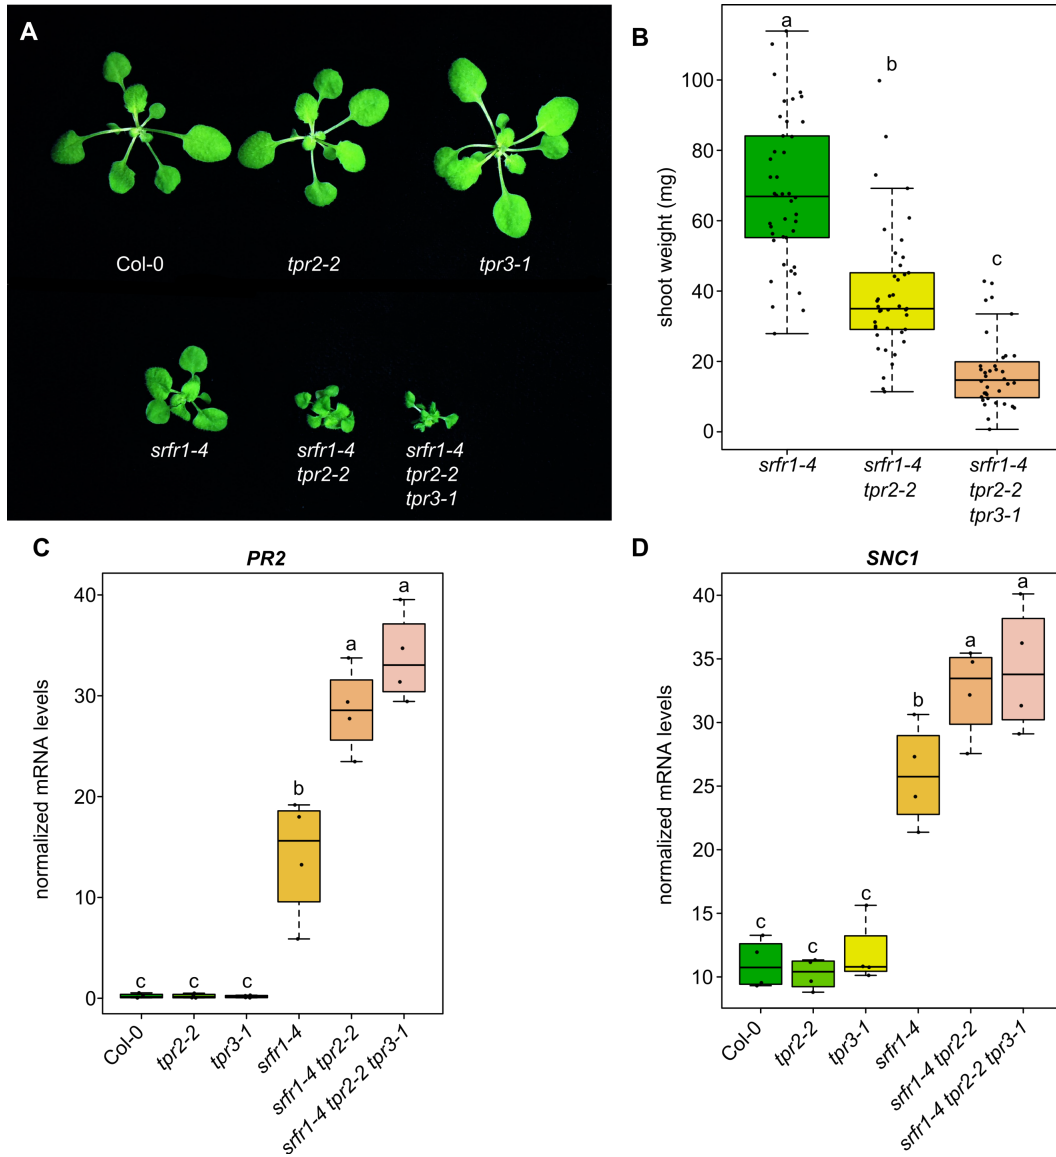

**Fig 3. Simultaneous loss of *TPR2* and *TPR3* increases stunting and expression of *PR2* and *SNC1* in *srfr1*.**

(A) Morphological phenotype of *srfr1-4*, *srfr1-4 tpr2-2*, and *srfr1-4 tpr2-2 tpr3-1* at 20 days after sowing. Plants were grown under short day conditions at 21°C. (B) Shoot weight from plants grown under short day conditions at 21°C for four weeks. Dots represent individual data points taken over two separate experiments. Whiskers on boxplots are drawn to the farthest data point within 1.5 \* IQR of first and third quartiles. Letters denote significant differences as determined by Student's t-test ( $P < 0.001$ ) using the Bonferroni-Holm method to correct for multiple comparisons. (C&D) Expression as measured by quantitative RT-PCR of *PR2* and *SNC1* in single, double, and triple mutants. Dots represent individual data points taken over two separate experiments. Genes of interest were normalized against *SAND* (At2g28390). Whiskers on boxplots are drawn to the farthest data point within 1.5 \* IQR of first and third quartiles. Letters denote significant differences as determined by Student's t-test ( $P < 0.05$ ) using the Bonferroni-Holm method to correct for multiple comparisons.

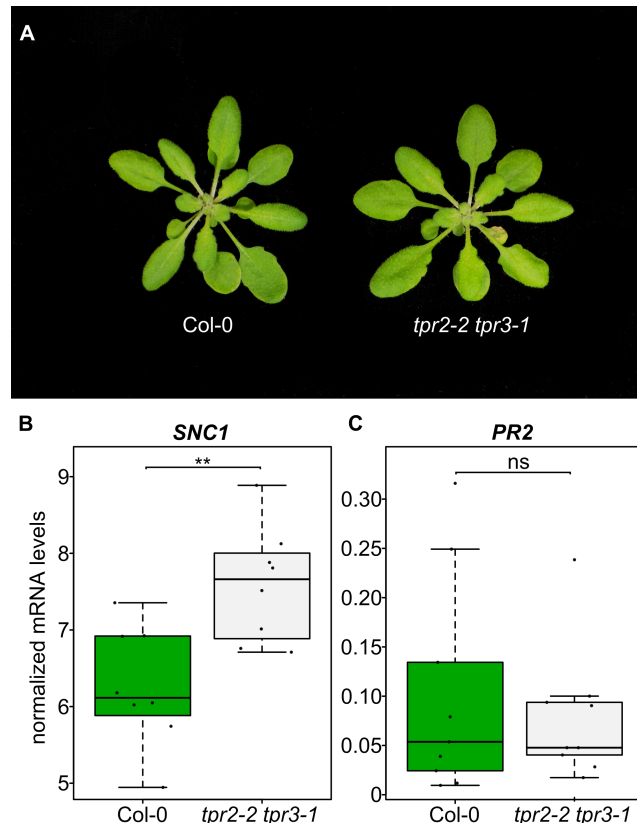

**Fig 4. *SNC1* expression is increased in *tpr2 tpr3***

(A) Morphological phenotype of *tpr2-2 tpr3-1*. Plants were grown for four weeks under short day conditions at 21°C. (B&C) Expression as measured by quantitative RT-PCR of *PR2* and *SNC1*. Dots represent individual data points taken over two separate experiments. Genes of interest were normalized against *SAND* (At2g28390). Whiskers on boxplots are drawn to the farthest data point within 1.5 \* IQR of first and third quartiles. Asterisks denote significant differences as determined by Student's t-test ( $P < 0.005$ ) using the Bonferroni-Holm method to correct for multiple comparisons.

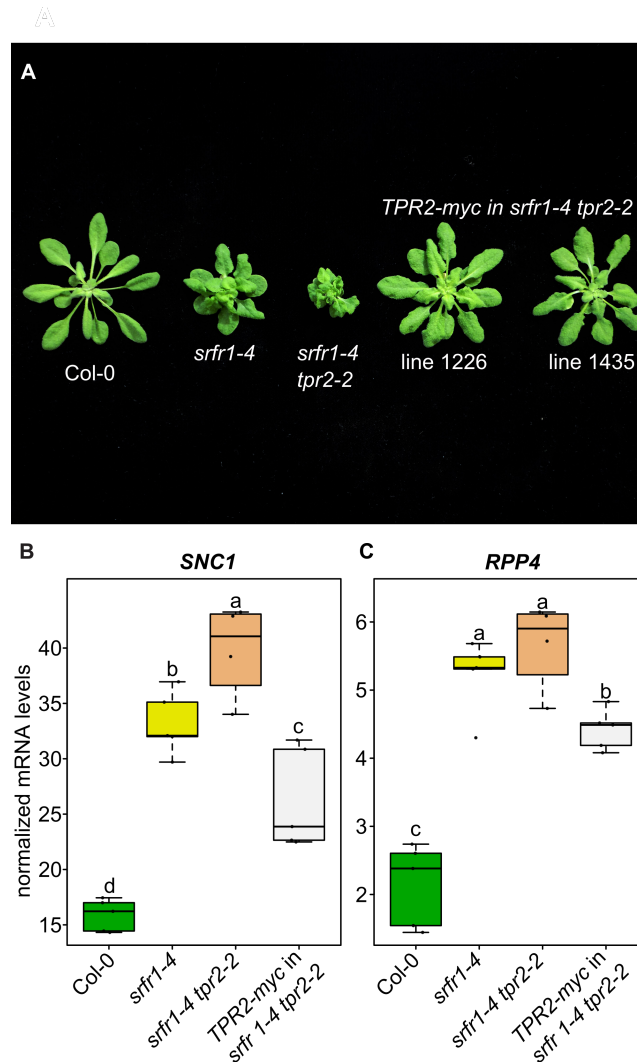

**Fig 5. Overexpression of TPR2 reduces stunting and *SNC1* expression in *sfr1 tpr2***

(A) Morphological phenotype of *TPR2-myc sfr1-4 tpr2-2* compared to *sfr1-4* and *sfr1-4 tpr2-2*. Plants were grown under short day conditions at 21°C for four weeks. (B&C) Expression as measured by quantitative RT-PCR of *SNC1* and *RPP4*. Dots represent individual data points taken over two separate experiments. Genes of interest were normalized against *SAND* (At2g28390). Whiskers on boxplots are drawn to the farthest data point within 1.5 \* IQR of first and third quartiles. Letters denote significant differences as determined by Student's t-test ( $P < 0.05$ ) using the Bonferroni-Holm method to correct for multiple comparisons.

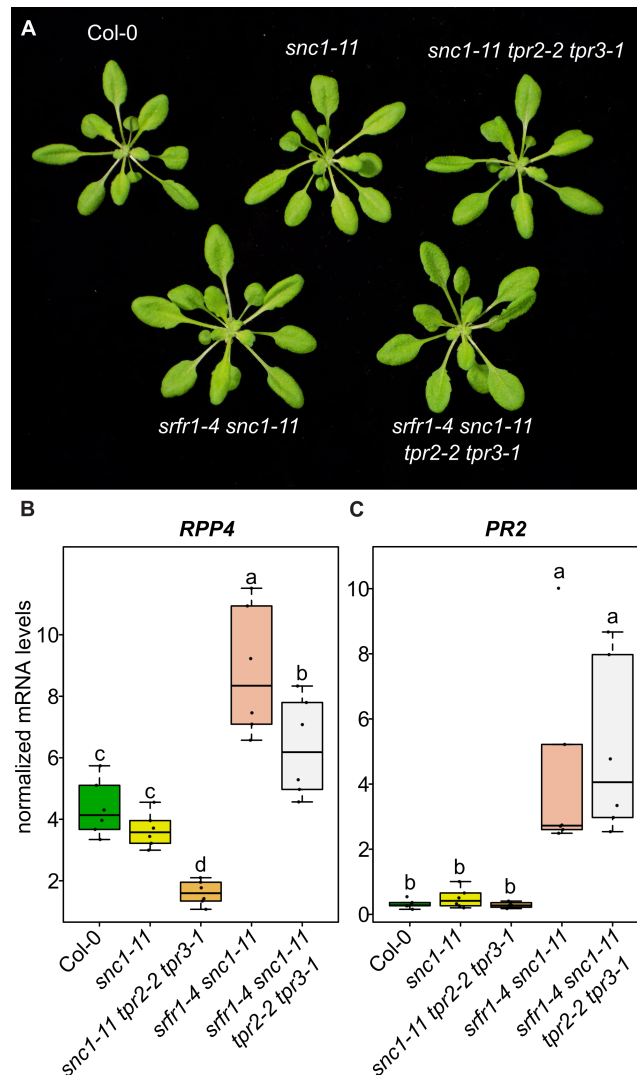

**Fig 6. *tpr2 tpr3* mutants have lower expression of *RPP4* in *snc1* knockouts**

(A) Morphological phenotype of plants harboring the *snc1-11* mutation crossed into *sfr1* and *tpr2 tpr3* mutants. Plants were grown under short day conditions at 21°C for four weeks. (B&C) Expression as measured by quantitative RT-PCR of *RPP4* and *PR2*. Dots represent individual data points taken over two separate experiments. Genes of interest were normalized against *SAND* (At2g28390). Whiskers on boxplots are drawn to the farthest data point within 1.5 \* IQR of first and third quartiles. Letters denote significant differences as determined by Student's t-test ( $P < 0.05$ ) using the Bonferroni-Holm method to correct for multiple comparisons.

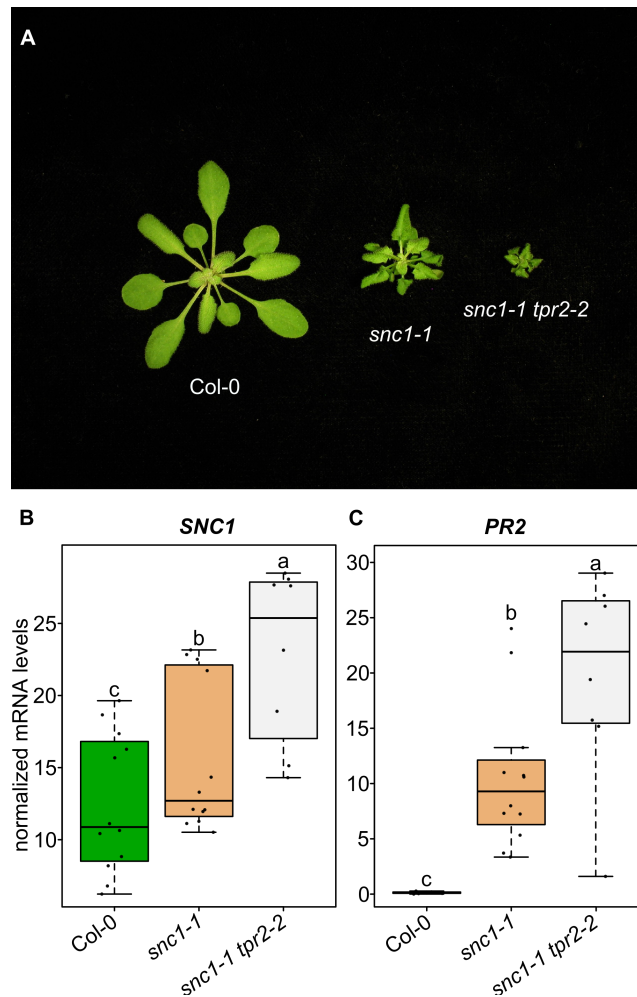

**Fig 7. Mutations in *TPR2* increase stunting and *SNC1* expression in *snc1-1* mutants**

(A) Morphological phenotypes of *snc1-1* and *snc1-1 tpr2-2*. Plants were grown under short day conditions at 21°C for four weeks. (B&C) Expression as measured by quantitative RT-PCR of *SNC1* and *PR2*. Dots represent individual data points taken over two separate experiments. Genes of interest were normalized against *SAND* (At2g28390). Whiskers on boxplots are drawn to the farthest data point within 1.5 \* IQR of first and third quartiles. Letters denote significant differences as determined by Student's t-test ( $P < 0.01$ ) using the Bonferroni-Holm method to correct for multiple comparisons.

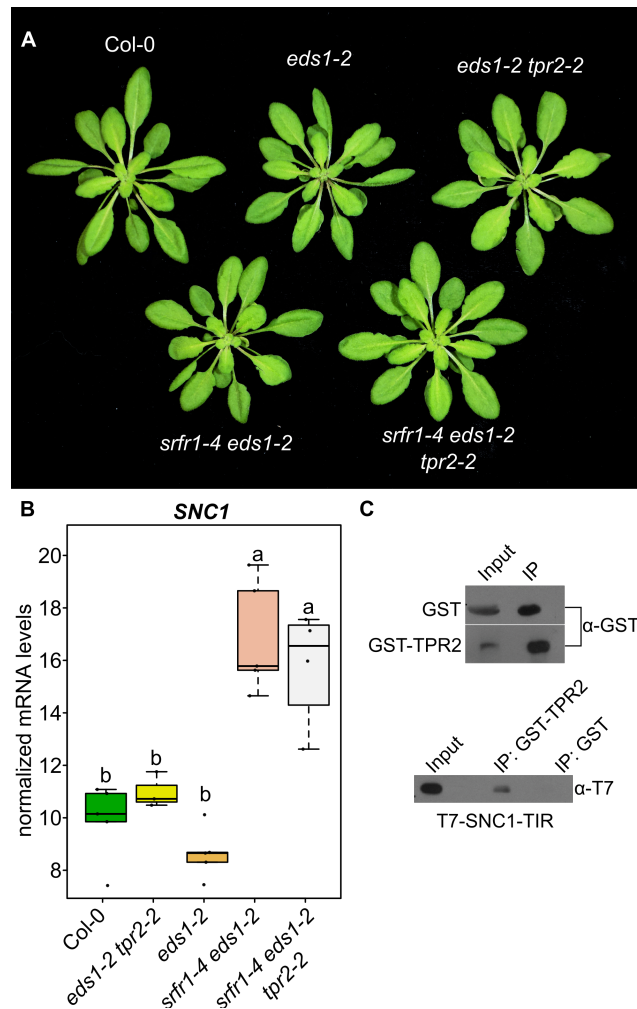

### Fig 8. SFRF1 acts upstream of SNC1 transcription

(A) Morphological phenotypes of single, double, and triple mutants of *eds1-2*, *sfr1-4*, and *tpr2-2*. Plants were grown under short day conditions at 21°C for four weeks. (B) Expression as measured by quantitative RT-PCR of *SNC1*. Dots represent individual data points taken over two separate experiments. Genes of interest were normalized against *SAND* (At2g28390). Whiskers on boxplots are drawn to the farthest data point within 1.5 \* IQR of first and third quartiles. Letters denote significant differences as determined by Student's t-test ( $P < 0.01$ ) using the Bonferroni-Holm method to correct for multiple comparisons. (C) *In vitro* interaction of TPR2 and the TIR domain of SNC1 in *E. coli*. Proteins were pulled down and subjected to immunoblot analysis with either GST or T7 antibodies. This experiment was repeated once with similar results.

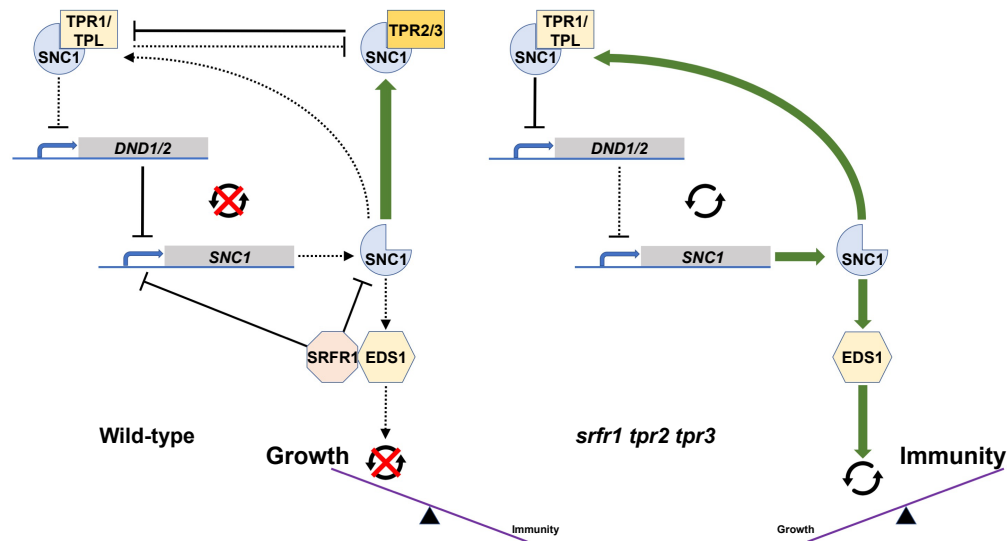

**Fig 9. Model for TPR2/TPR3 and SFRF1 functions in SNC1-mediated autoimmunity**

(Left) In Col-0, low levels of *SNC1* help to avoid fitness penalties. This may be accomplished both through direct inhibition by *SRFR1* and through competitive inhibition by *TPR2* (additively with *TPR3*) of the demonstrated *TPR1*-*SNC1* interaction that affects negative regulators of immunity such as *DND1/DND2* and indirectly subsequent *SNC1* expression. Here, the combined effects of *SRFR1* and *TPR2* hold *SNC1* expression in check. (Right) In the *sfrf1-4 tpr2-2 tpr3-1* triple mutant, these molecular check points are released, allowing *SNC1* expression to trigger an autoimmune response that results in excessive stunting.

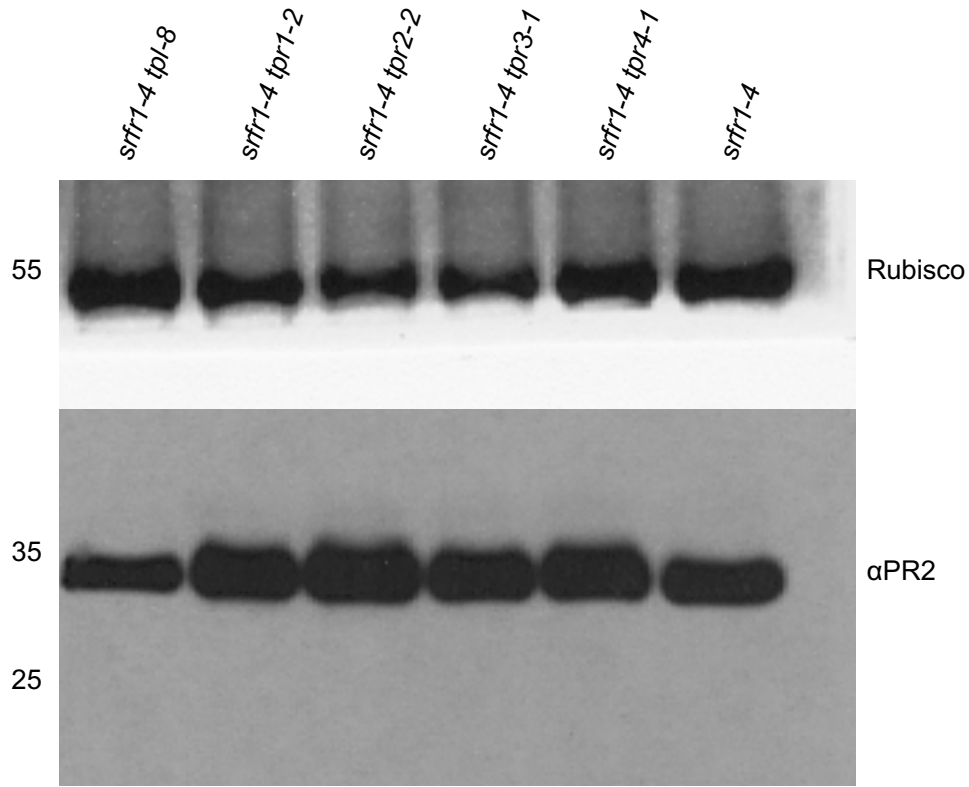

**S1 Fig. PR2 expression in *srfr1-4* is affected by *tpl* and *tpr2***

Western blot of total protein extracted from *srfr1-4*, *srfr1-4 tpl-8*, *srfr1-4 tpr1-2*, *srfr1-4 tpr2-2*, *srfr1-4 tpr3-1*, and *srfr1-4 tpr4-1*. The large subunit of rubisco is shown as a loading control.



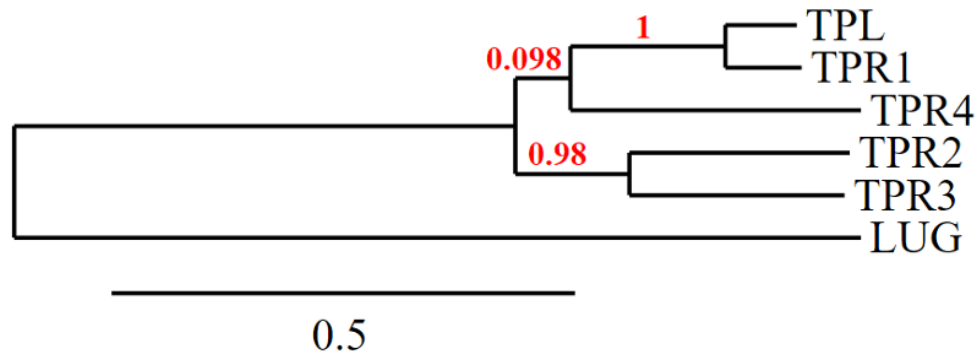

**S2 Fig. Phylogenetic tree of the *Arabidopsis thaliana* TOPLESS family**

Phylogram showing evolutionary relationships amongst *TOPLESS* family members. The WD40 protein *LEUNIG* (*LUG*) is included as the outgroup. Tree was generated from full length cDNA sequences using [www.phylogeny.fr](http://www.phylogeny.fr).

**S1 Table. PCR primers used for genotyping mutant lines**

| Name            | sequence                   | Use                     |
|-----------------|----------------------------|-------------------------|
| LBa1            | TGGTTCACGTAGTGGGCCATCG     | SALK line border primer |
| TPL8 LP         | TTGGTTCTCGCGAAAGATTAG      | tpl-8                   |
| TPL8 RP         | AGGAGAGAGCCTTCCTTGTTG      | tpl-8                   |
| TPR1-2 LP       | AAGGCCTCGAGATACTTCTGC      | tpr1-2                  |
| TPR1-2 RP       | ACTCCGTTATCCGTCACCTTC      | tpr1-2                  |
| TPR2-2 LP       | TCAGCATCAAAGACTGCAATG      | tpr2-2                  |
| TPR2-2 RP       | TGGGAAGGTGATTCGTTGTAC      | tpr2-2                  |
| TPR2-1 LP       | TCCTTGTTGAATCTCAATCGG      | tpr2-1                  |
| TPR2-1 RP       | ACGTCAACACCTCGAGGTATG      | tpr2-1                  |
| TPR3-1LP        | GTTCTCTTGCAGCCTCAATTG      | tpr3-1                  |
| TPR3-1RP        | TTCCACAATGTGATTTCTCC       | tpr3-1                  |
| TPR4-1 GTF      | ATGTCGTCACTCAGCAGAGAACTC   | tpr4-1                  |
| TPR4-1 GTR      | GCAAAGCTGATGTTGCCAGTTCAA   | tpr4-1                  |
| SNC1-11 LP      | TCGGCATAACATCGTAAGAGC      | snc1-11                 |
| SNC1-11 RP      | CAAGCTTTCGTGGAGAAGATG      | snc1-11                 |
| SNC1 FOR GT     | GGCATGCGTAATCTGCAATATCTAG  | snc1-1                  |
| SNC1 LESLEY REV | GAGGTAICTCGAGAGATTCCAAGTTG | snc1-1                  |
| SNC1-1 GT FOR   | GGCATGCGTAATCTGCAATATCTAa  | snc1-1                  |
| 37460-18        | TCTCCACTGTACTAATTTCCCT     | srfr1-4                 |
| 37460-R         | ACTAATTCGCAACGTGCCT        | srfr1-4                 |
| EDS1 F2         | CCCTTTCTAGTTTCCTTGAGCTAAG  | eds1-2                  |
| EDS1 R3         | TCAGGTATCTGTTATTTTCATCCATC | eds1-2                  |

**S2 Table. Primers used for qPCR**

| Primer name     | sequence                |
|-----------------|-------------------------|
| SAND CDNA FOR 1 | CACTTGCAGACAAGGCGATG    |
| SAND CDNA REV 1 | CCTTTGGCACACCTGATTGC    |
| TPR2 CDNA FOR4  | ATTATTGCAATCGGGATGGA    |
| TPR2 CDNA RP5   | CTTGGGGCACCCACTTATGA    |
| QRT SNC1 FOR1   | GCGGTGTACGACTCATGTATGTC |
| QRT SNC1 REV1   | GATGTCATCCGCATCCGCTT    |
| PR2 QRT FOR1    | TTCAACCACACAGCTGGACA    |
| PR2 QRT REV1    | GGCAAGGTATCGCCTAGCAT    |
| RPP4 QRT FOR1   | GGAAGGCATCCAGTCGCTT     |
| RPP4 QRT REV1   | CACCAAACCTTTTGCACCCGT   |
